# Supplementary material for: Endophytic fungi specifically introduce novel metabolites into grape flesh cells in vitro
Source: PubMed Central journal article supplement (PMC5937782; doi:10.1371/journal.pone.0196996), 2018-05-07
Supplement: pone.0196996.s001.pdf [file pone.0196996.s001.pdf]

S1 fig

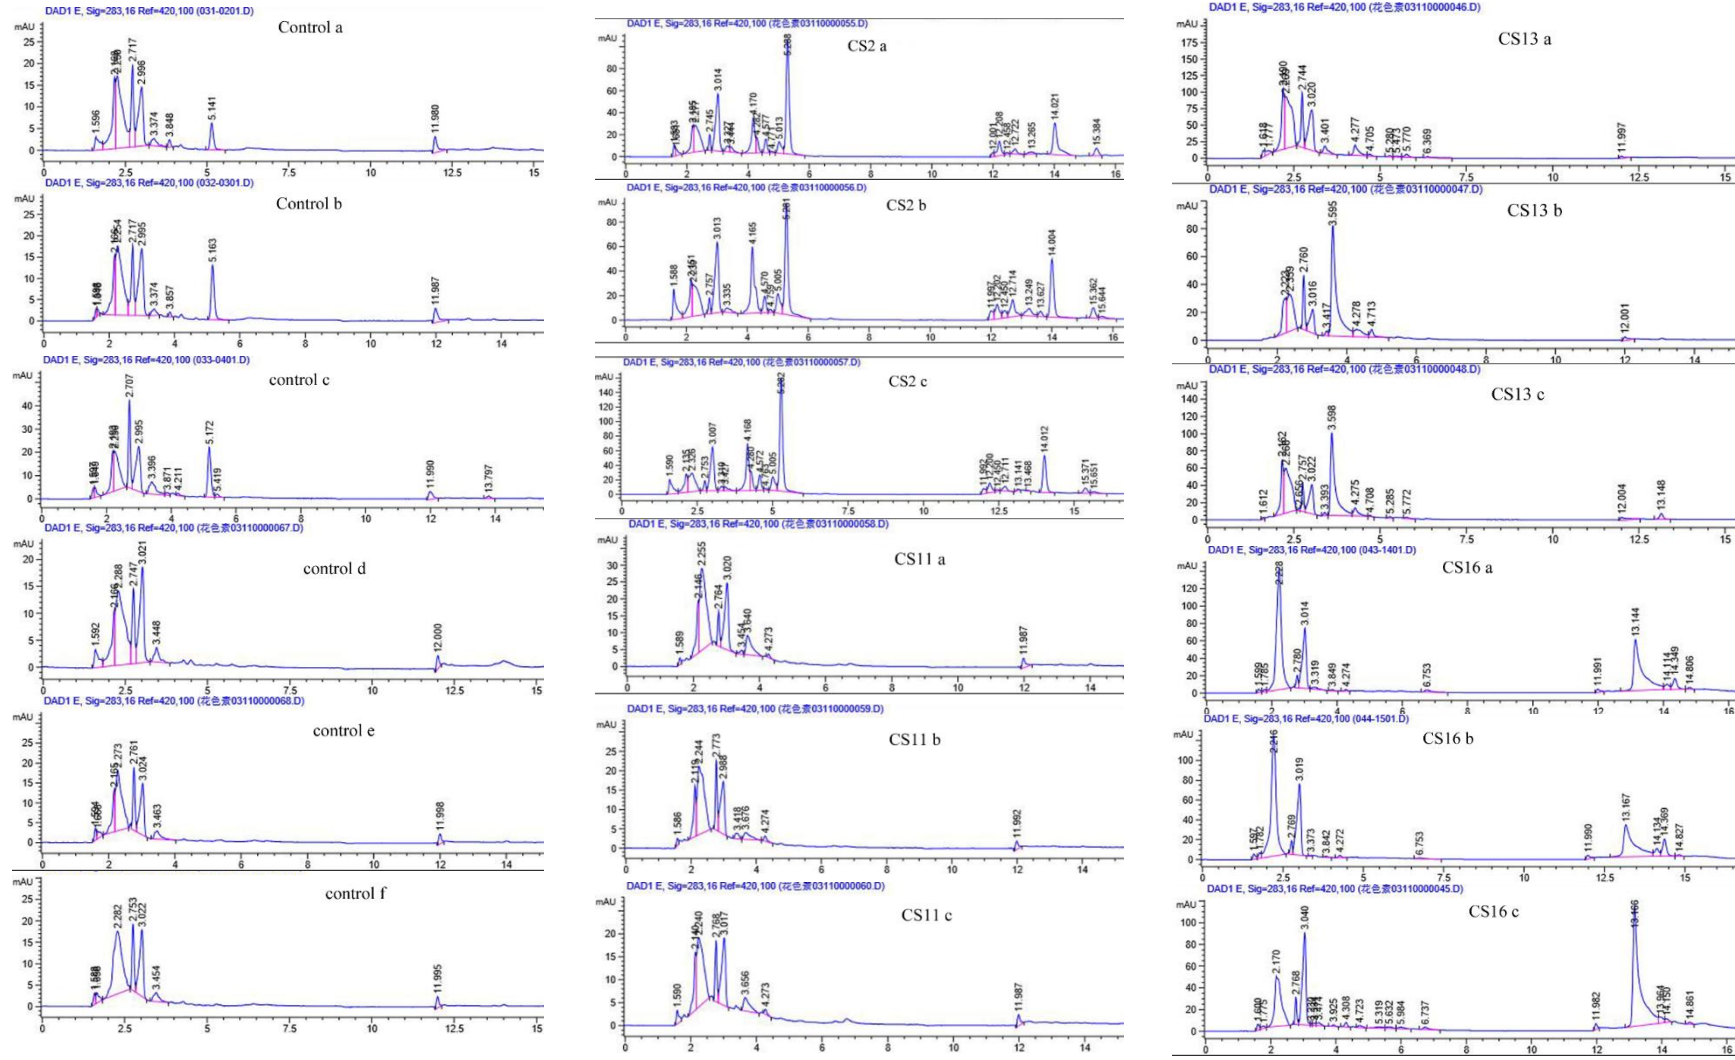

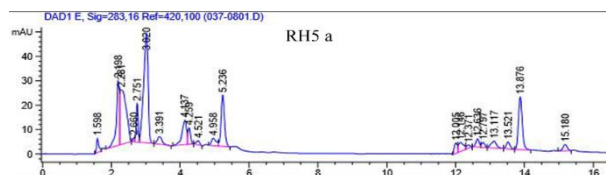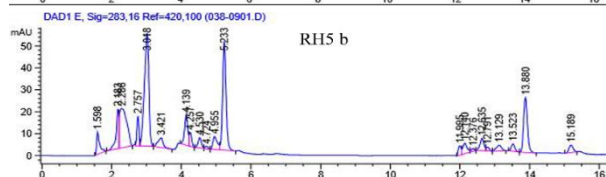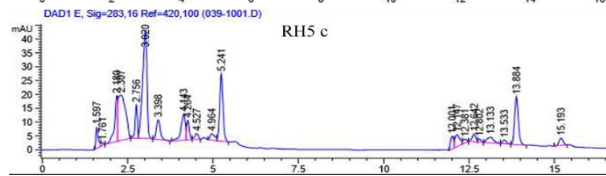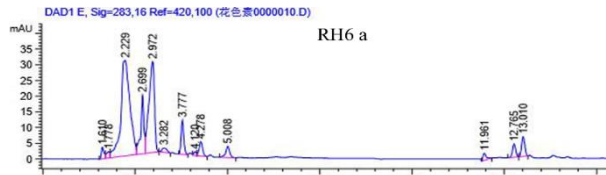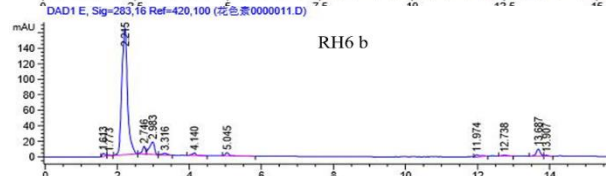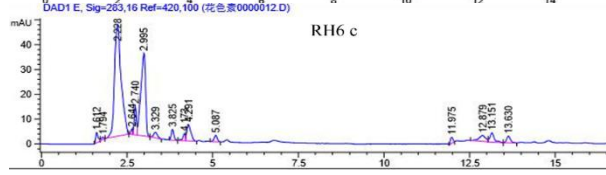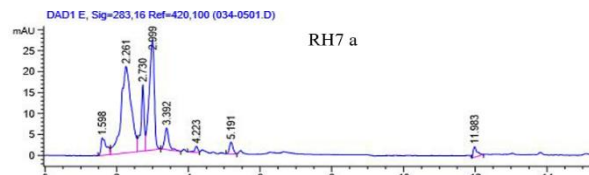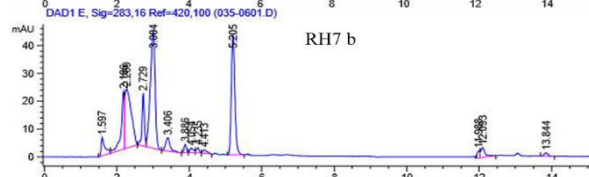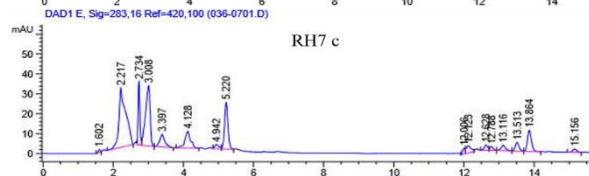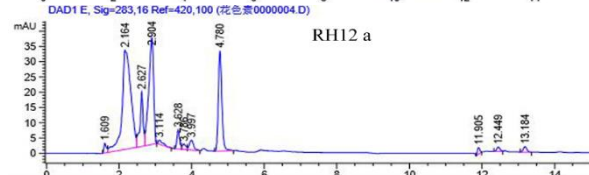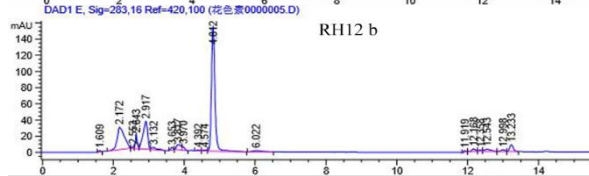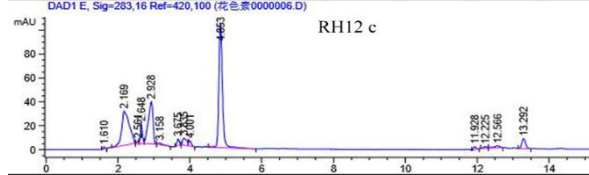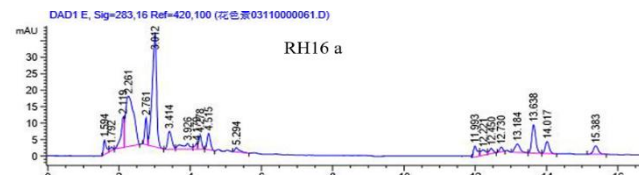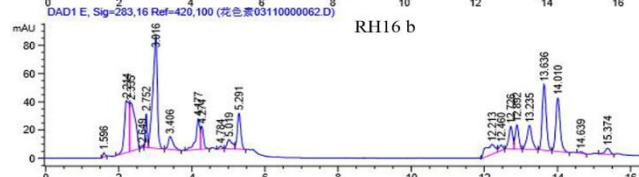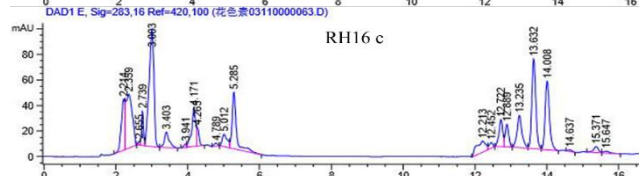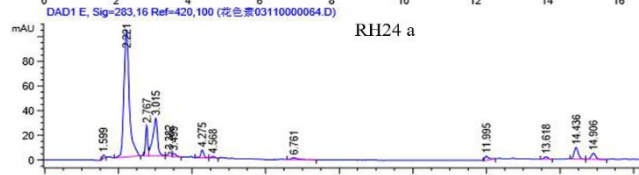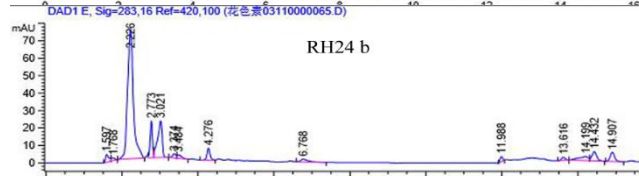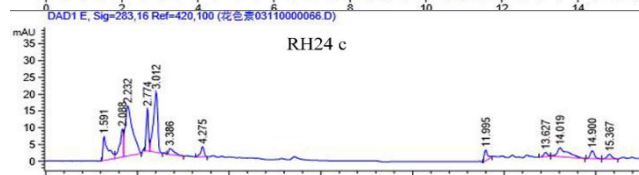

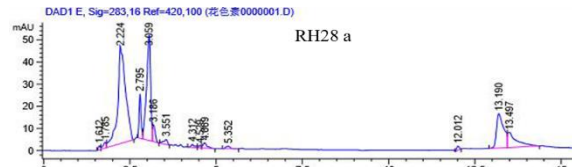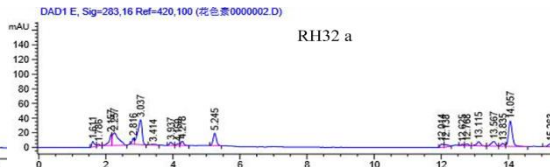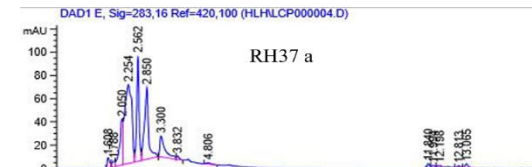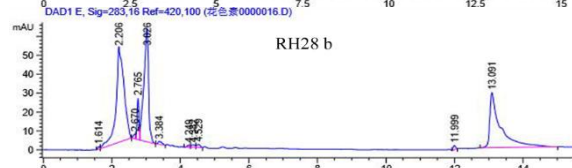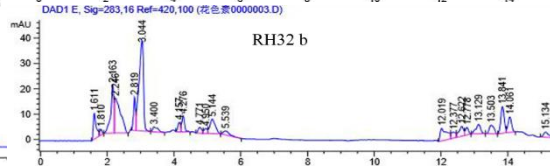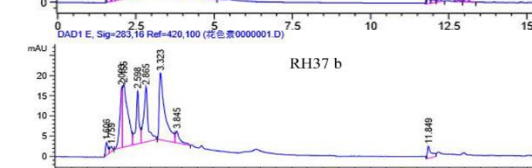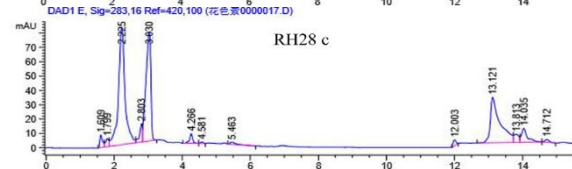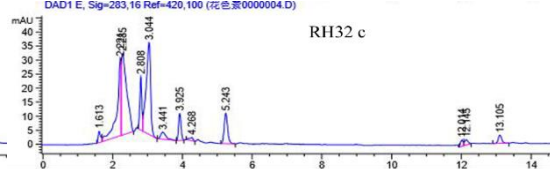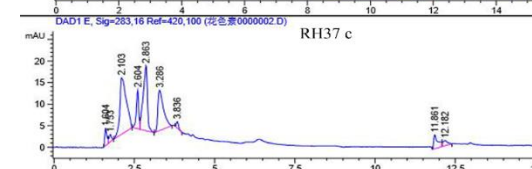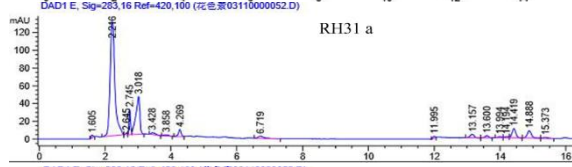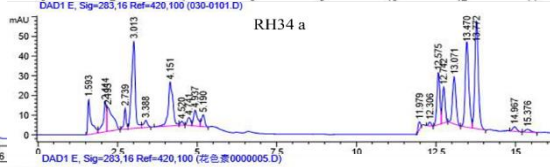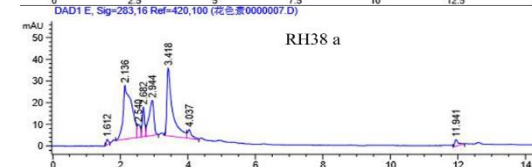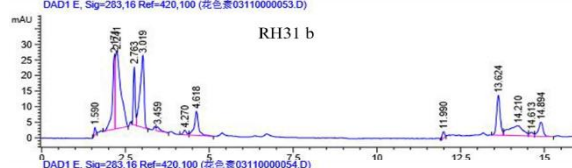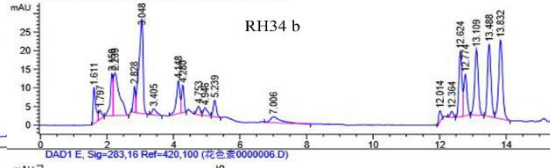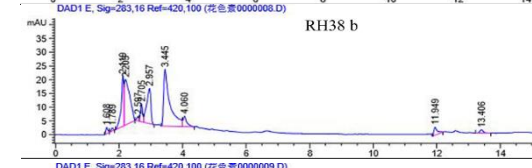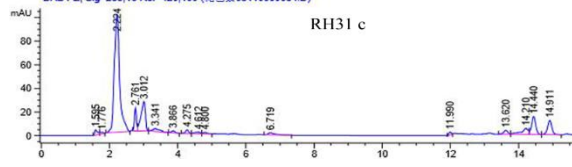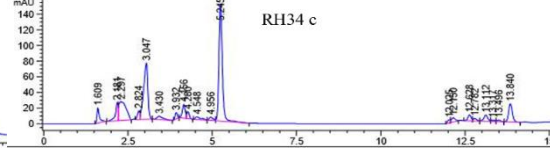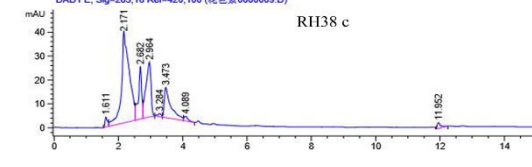

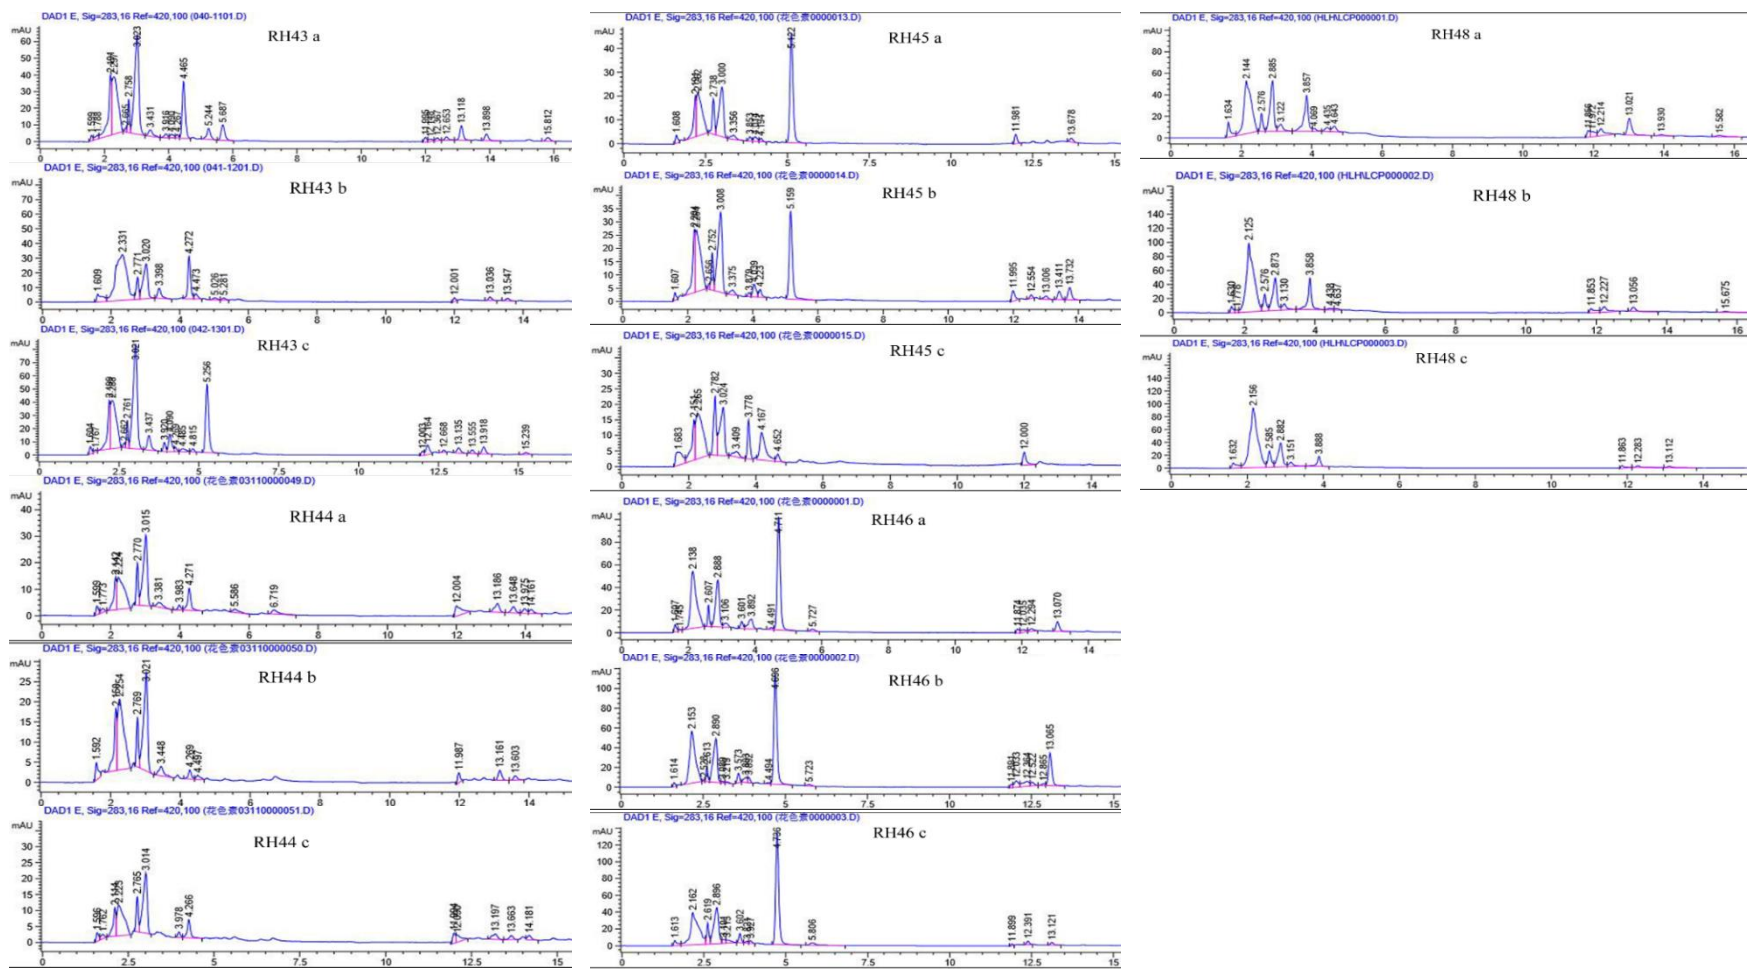

**S1 Fig.** HPLC chromatograms of all samples of grape cell extracts after co-cultured with different endophytic fungal strains (EFS).
