# Supplementary material for: Endophytic fungi specifically introduce novel metabolites into grape flesh cells in vitro
Source: PubMed Central journal article supplement (PMC5937782; doi:10.1371/journal.pone.0196996), 2018-05-07
Supplement: pone.0196996.s002.pdf [file pone.0196996.s002.pdf]

**S1 Table.** Approaches gradient elution for HPLC

| Time duration (min) | Elution solution (%) | Water (%) |
|---------------------|----------------------|-----------|
| 0-2                 | 35                   | 65        |
| 2-5                 | 15                   | 85        |
| 5-8                 | 20                   | 80        |
| 8-15                | 40                   | 60        |
| 15-20               | 35                   | 65        |
