# Supplementary material for: Endophytic fungi specifically introduce novel metabolites into grape flesh cells in vitro
Source: PubMed Central journal article supplement (PMC5937782; doi:10.1371/journal.pone.0196996), 2018-05-07
Supplement: pone.0196996.s003.pdf [file pone.0196996.s003.pdf]

**S2 Table.** HPLC detected metabolites and peak areas (mAU\*S).

| RT      | 2.25 | 2.72 | 2.99 | 3.37 | 3.59 | 3.78 | 3.99 | 4.28 | 4.5 | 4.8 | 5   | 5.14 | 11.9 | 12.1 | 12.3 | 12.5 | 12.8 | 13   | 13.5 | 13.8 | 14  | 14.4 | 14.97 | 15.2 | 15.6 |  |
|---------|------|------|------|------|------|------|------|------|-----|-----|-----|------|------|------|------|------|------|------|------|------|-----|------|-------|------|------|--|
| Control | 314  | 131  | 166  | 36   |      |      |      |      |     |     |     | 92   | 30   |      |      |      |      |      |      |      |     |      |       |      |      |  |
| RH6     | 967  | 75   | 260  | 17   |      |      |      | 37   |     |     |     | 24   | 17   |      |      |      | 23   | 48   |      |      |     |      |       |      |      |  |
| RH12    | 450  | 79   | 319  |      |      | 46   | 23   |      |     | 666 |     |      | 11   |      |      |      | 21   | 45   |      |      |     |      |       |      |      |  |
| RH28    | 868  | 78   | 576  |      |      |      |      | 22   |     | 12  |     |      | 15   |      |      |      |      | 560  |      |      |     |      |       |      |      |  |
| RH32    | 376  | 55   | 309  | 20   |      |      | 31   | 34   |     |     |     | 83   | 35   | 20   |      |      | 17   | 35   | 46   | 52   | 160 |      |       | 32   |      |  |
| RH34    | 322  | 44   | 400  | 32   |      |      | 109  | 41   |     | 41  |     | 373  | 19   |      | 21   | 112  | 70   | 128  | 168  | 258  |     |      |       |      |      |  |
| RH37    | 593  | 207  | 273  | 177  |      |      | 17   |      |     |     |     |      | 28   | 13   |      |      |      |      |      |      |     |      |       |      |      |  |
| RH38    | 460  | 87   | 178  | 276  |      |      | 28   |      |     |     |     |      | 21   |      |      |      |      |      |      |      |     |      |       |      |      |  |
| RH45    | 337  | 81   | 216  | 20   |      | 27   | 52   | 13   |     |     |     | 271  | 27   |      |      |      |      |      |      | 24   |     |      |       |      |      |  |
| RH46    | 647  | 86   | 390  | 28   |      | 45   | 44   | 10   |     | 762 |     |      | 15   |      | 40   |      |      | 107  |      |      |     |      |       |      |      |  |
| RH48    | 1176 | 128  | 363  | 65   |      |      | 235  | 19   |     |     |     |      | 42   |      | 61   |      |      | 67   |      |      |     |      |       |      | 16   |  |
| CS2     | 553  | 60   | 488  | 47   |      |      | 410  | 104  |     | 76  | 135 | 837  | 49   | 116  | 28   | 84   |      | 41   |      | 359  |     |      |       |      | 68   |  |
| CS11    | 342  | 55   | 137  |      |      | 46   |      | 6    |     |     |     |      | 16   |      |      |      |      |      |      |      |     |      |       |      |      |  |
| CS13    | 1100 | 220  | 361  | 46   | 872  |      |      | 114  |     | 22  |     |      | 31   |      |      |      |      |      |      |      |     |      |       |      |      |  |
| CS16    | 1204 | 71   | 621  | 15   |      | 9    |      | 16   |     |     |     |      | 26   |      |      |      |      | 1118 |      |      | 63  | 96   | 12    |      |      |  |
| RH5     | 384  | 59   | 405  | 44   |      |      | 87   | 35   |     |     | 35  | 216  | 26   | 41   | 10   | 29   | 10   | 29   | 18   | 164  |     |      | 24    |      |      |  |
| RH7     | 400  | 97   | 308  | 49   |      |      | 91   | 9    |     |     |     | 156  | 16   | 32   |      |      |      |      |      | 46   |     |      |       |      |      |  |
| RH16    | 594  | 73   | 611  | 81   |      |      | 144  | 57   |     |     | 81  | 184  | 105  | 17   | 23   | 156  | 118  | 128  | 322  |      | 264 |      |       | 36   |      |  |
| RH24    | 695  | 79   | 199  | 17   |      |      |      | 32   |     |     |     |      | 20   |      |      |      |      |      | 11   |      |     | 49   | 33    |      |      |  |
| RH31    | 926  | 81   | 259  |      |      |      |      | 24   | 40  |     |     |      | 11   |      |      |      |      |      | 47   |      | 60  | 73   | 74    |      |      |  |
| RH43    | 697  | 80   | 509  | 59   |      |      | 52   | 64   | 90  |     |     | 140  | 16   | 35   |      |      |      | 37   | 16   | 36   |     |      |       |      |      |  |
| RH44    | 248  | 52   | 198  |      |      |      | 11   | 38   |     |     |     |      | 27   |      |      |      |      | 23   | 13   |      |     |      |       |      |      |  |
